# Supplementary material
Source: Springer Nature journal article supplement (https://www.springermedizin.de/resource/supplementary/13019_2011_459_MOESM1_ESM.pdf/9638738)

|   |                                          |
|---|------------------------------------------|
| A | Jugular notch                            |
| B | End of body of sternum                   |
| C | Middle of transpyloric line              |
| D | Middle of trans-SA iliac crest           |
| E | Pubic symphysis                          |
| F | R 'Superior anterior iliac crest         |
| G | L 'Superior anterior iliac crest         |
| H | Middle of trans-'R' SAIC-Pubic symphysis |

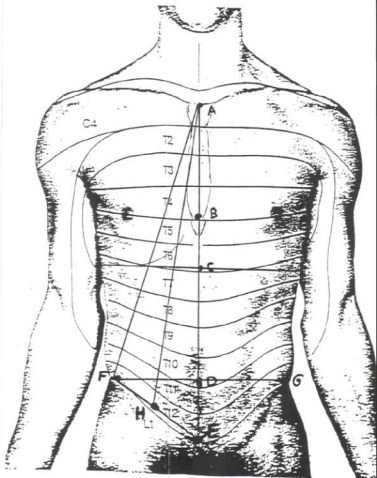

|   |                        |
|---|------------------------|
| K | End of Left Subclavian |
| L | Celiac artery          |
| M | Renal artery           |
| N | Aorta bifurcation      |

  

|   |                        |
|---|------------------------|
| X | Tip of IABC            |
| Y | End of IABC            |
| Z | Site of IABC insertion |

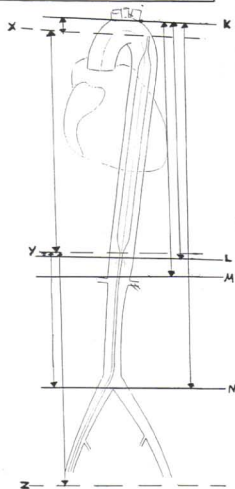

Supplement: MOESM1 [file 9638738]
